# Supplementary material
Source: PubMed Central journal article supplement (PMC3624021)
Supplement: NIHMS452438-supplement-Supplementary_Table_1.pdf [file NIHMS452438-supplement-Supplementary_Table_1.pdf]

| Primer name                 | Nucleotide sequence (5'→3')        |
|-----------------------------|------------------------------------|
| ASPDEG                      | CGC AGT CSA RRT ACC AVG CRT CVA C  |
| SPDEG                       | TAC TGC GGH GAR CCN CCN TGY GG     |
| TnFDL ASP2                  | ACA CCT GCA CGC CTA GGT GAC        |
| TnFDL SP4DEG                | RYT NTG GCC NCA RCC NAC NGG        |
| TnFDL ASP3                  | GTC TAG CCG CTC TAA GTA CGG TG     |
| TnFDL SP1                   | TTG ACG GAG GTC GAC GAC CTG        |
| TnFDL ASP6DEG               | GCR TGN GGR TTR TGN SWR CAC C      |
| TnFDL ASP1                  | TGC GAG ATC ACG GTC CGG AAT C      |
| TnFDL ASP6                  | TCC GAC ACATCA CGA GAA GGA GAC     |
| TnFDL ASP7                  | GAG ACG TGA CGA TCT GCA GCT TG     |
| TnFDL SP4                   | GTG CCA GTG GAC GGA GCA GCT G      |
| TnFDL SP5                   | CGC GGC GGC CGA CGT GTA CCT        |
| TnFDL FL SP2 BD             | CAC CAT GAA GTG GTG GGG CGA CGC A  |
| TnFDL FL ASP2 BD            | CTA GAG GCA GGC GTG CGG GTT G      |
| BmFDL ASP1                  | ACG TCG TCG GAC GTG TAC ACT G      |
| BmFDL ASP4                  | TGT GGC CAG AGC TGG GTG GAG        |
| BmFDL ASP5                  | GAG GCG CAC AGC ATG TTG CAA GTC    |
| BmFDL SP4                   | GAT GTG TAC TTG CGG CTC GAC AC     |
| BmFDL SP5                   | GTA CTT GCG GCT CGA CAC ACA GC     |
| BmFDL FL SP2                | CAC CAT GAT GTC GTG GGG TGA TG     |
| BmFDL ASP1CLO               | ACT AGA GGC ACG CGT GCG G          |
| GeneRacer™ 5' Primer        | CGA CTG GAG CAC GAG GAC ACT GA     |
| GeneRacer™ 5' Nested Primer | GGA CAC TGA CAT GGA CTG AAG GAG TA |
| GeneRacer™ 3' Primer        | GCT GTC AAC GAT ACG CTA CGT AAC G  |
| GeneRacer™ 3' Nested Primer | CGC TAC GTA ACG GCA TGA CAG TG     |
